# Supplementary material for: From typhoon rainfall to slope failure: optimizing susceptibility models and dynamic thresholds for landslide warnings in Zixing City, China
Source: Copernicus journal article supplement (doi:10.5194/egusphere-2025-2298), 2025-08-11
Supplement: Supplementary file 1 [file egusphere-2025-2298-supplement.pdf]

# **Supplement**

## IV

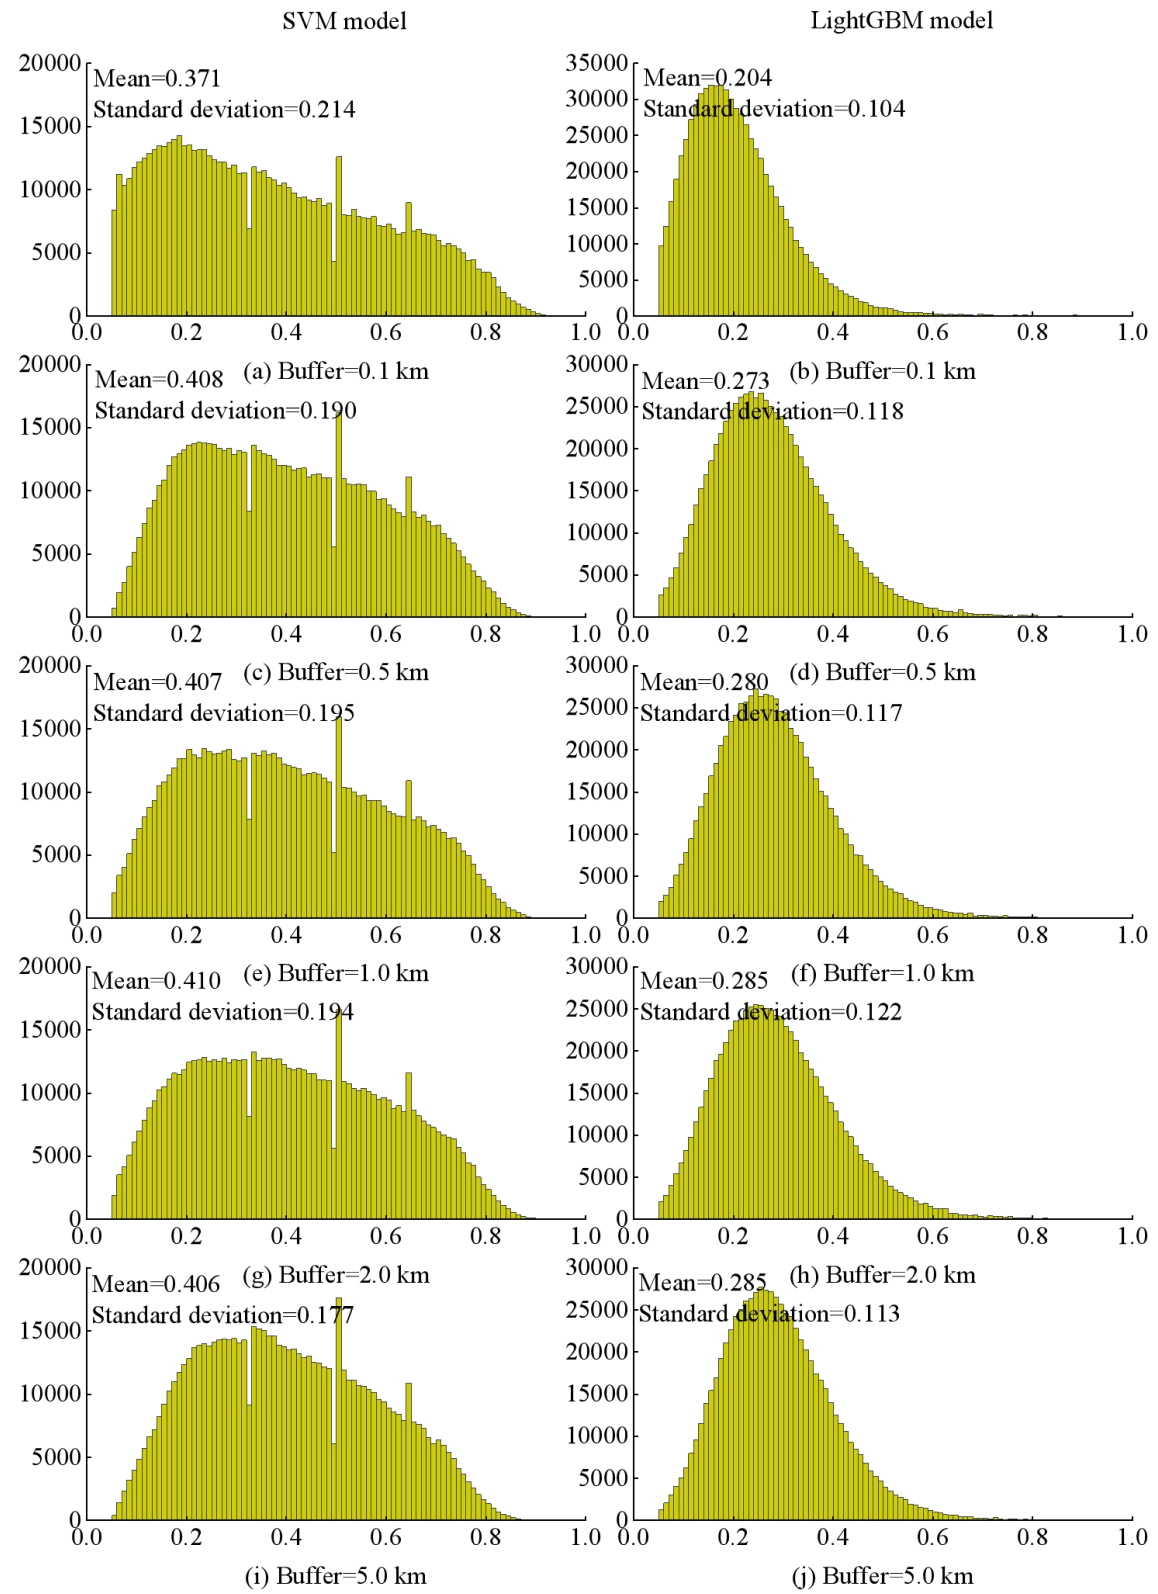

**Fig. S1** Landslide susceptibility predictions distribution based on IV input variable selection.

**CF**

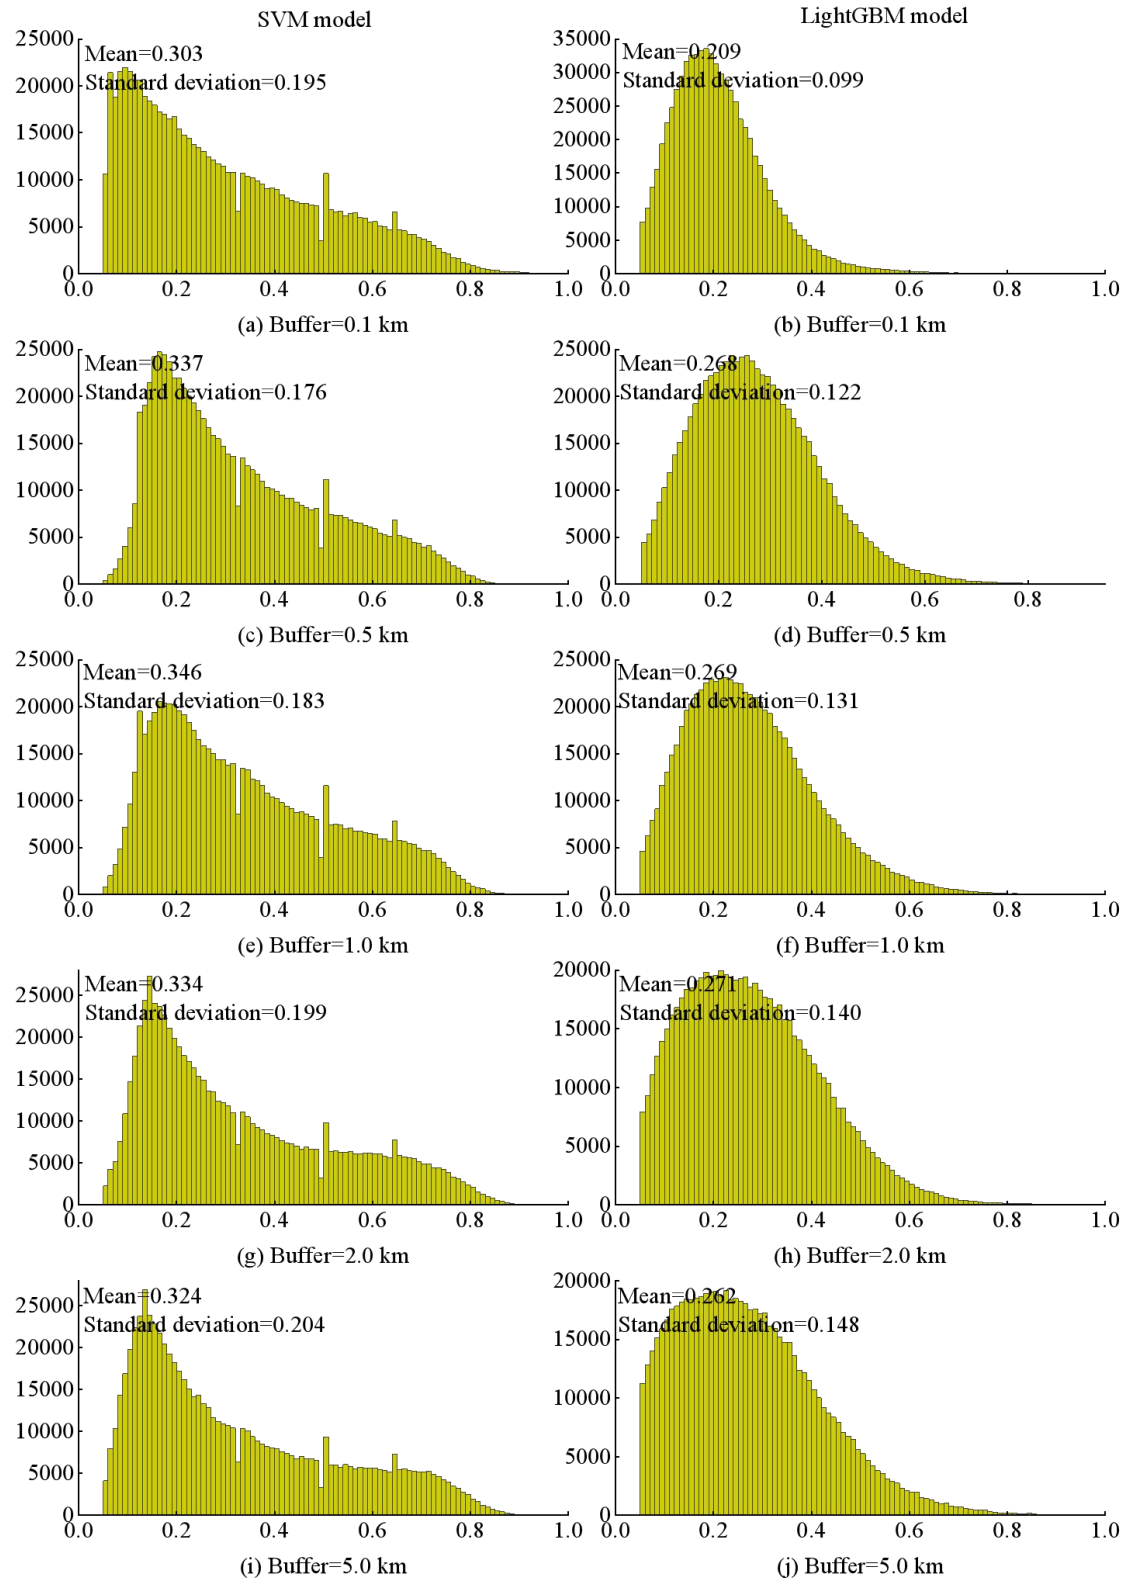

**Fig. S2** Landslide susceptibility predictions distribution based on CF input variable selection.

# FR

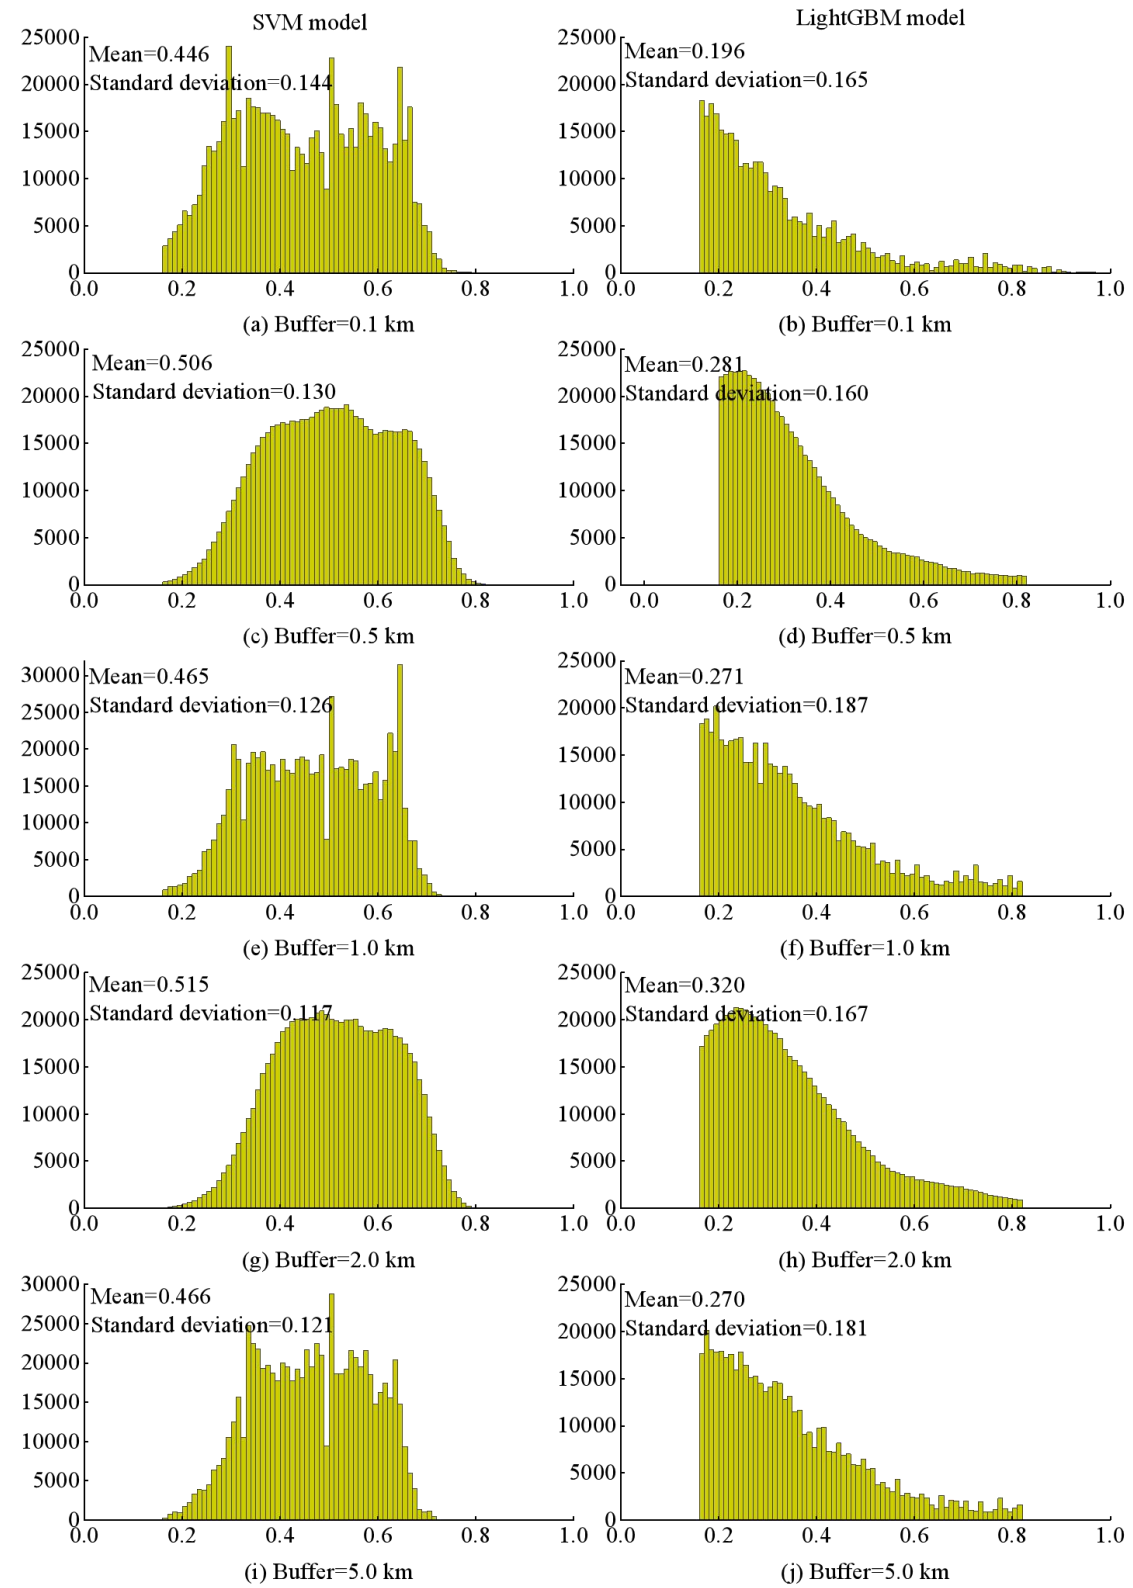

**Fig. S3** Landslide susceptibility predictions distribution based on FR input variable selection.
